# Supplementary material for: STAT3 and STAT5B Mutations in T/NK-Cell Chronic Lymphoproliferative Disorders of Large Granular Lymphocytes (LGL): Association with Disease Features
Source: PubMed Central journal article supplement (PMC7760806; doi:10.3390/cancers12123508), 2020-11-25
Supplement: cancers-12-03508-s001.pdf [file cancers-12-03508-s001.pdf]

# Supplementary Materials: *STAT3* and *STAT5B* Mutations in T/NK–Cell Chronic Lymphoproliferative Disorders of Large Granular Lymphocytes (LGL): Association with Disease Features

Noemí Muñoz–García, María Jara–Acevedo, Carolina Caldas, Paloma Bárcena, Antonio López, Noemí Puig, Miguel Alcoceba, Paula Fernández, Neus Villamor, Juan A. Flores–Montero, Karoll Gómez, María Angelina Lemes, Jose Carlos Hernández, Iván Álvarez–Twose, Jose Luis Guerra, Marcos González, Alberto Orfao and Julia Almeida, on behalf of the EuroFlow Consortium

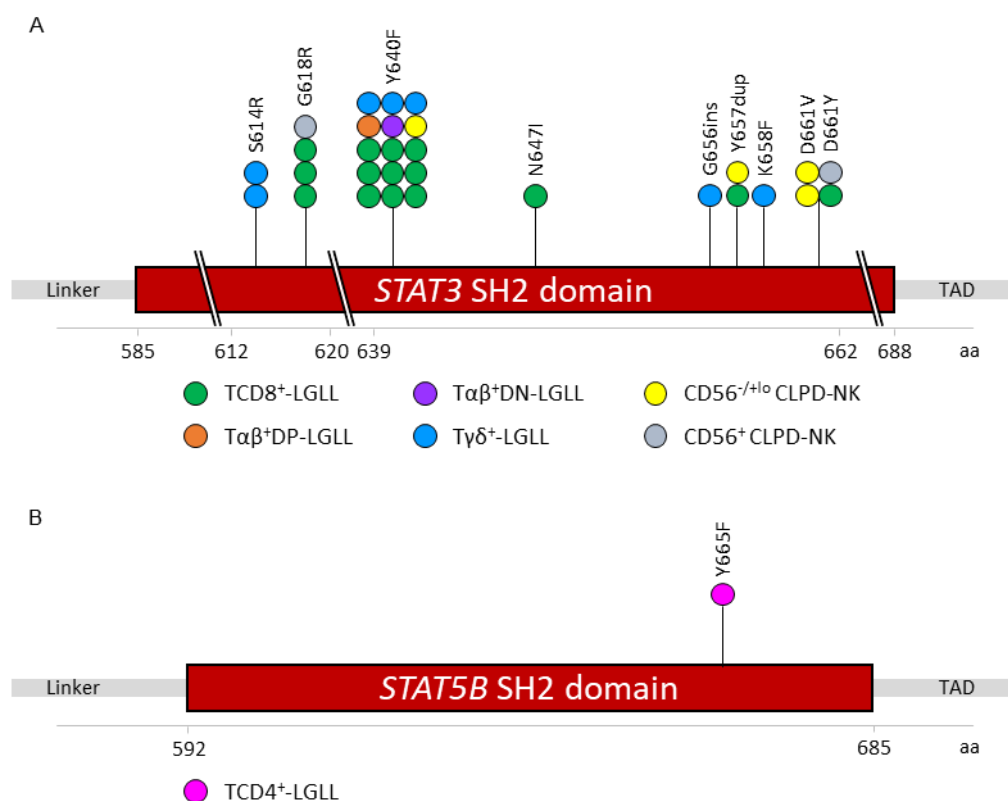

**Figure S1.** Lollipop diagrams representing the specific *STAT3* (A) and *STAT5B* (B) mutations identified in our T/NK–LGLL cohort and their relative position in the SH2 domain of both genes. Each circle represents one clonal T/NK–LGL population. Abbreviations (alphabetical order): aa, amino acid; LGLL, leukemia of large granular lymphocytes; SH2, Src homology 2; TAD, transactivation domain.

**A.  $Ty\delta^+$ -LGLL cell populations**

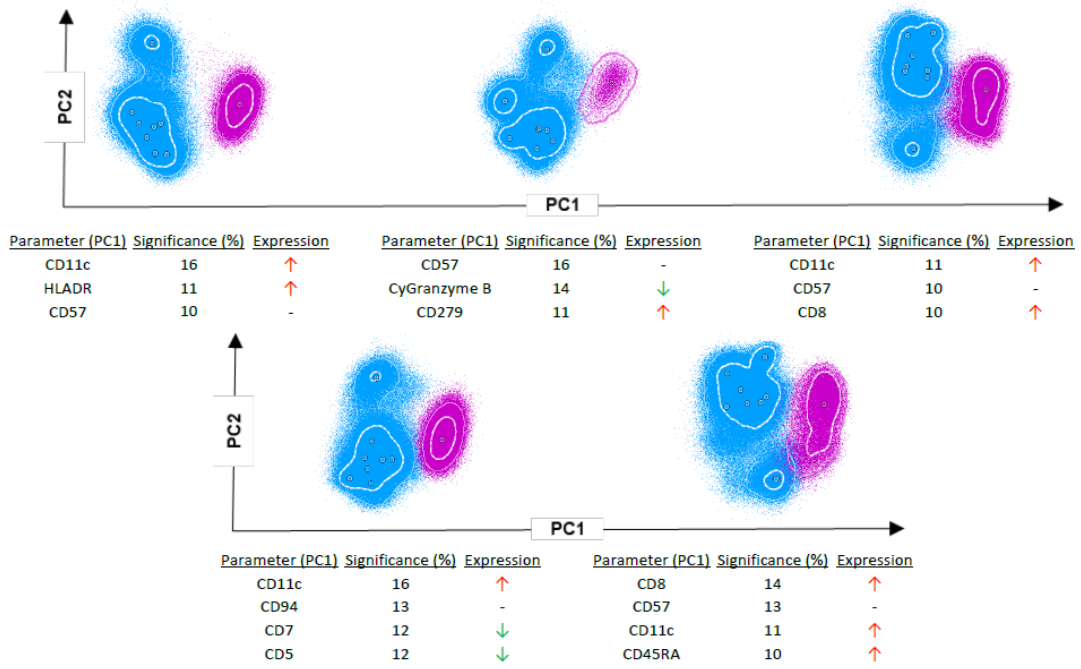

**B.  $CD56^{+/lo}$  CLPD-NK cell populations**

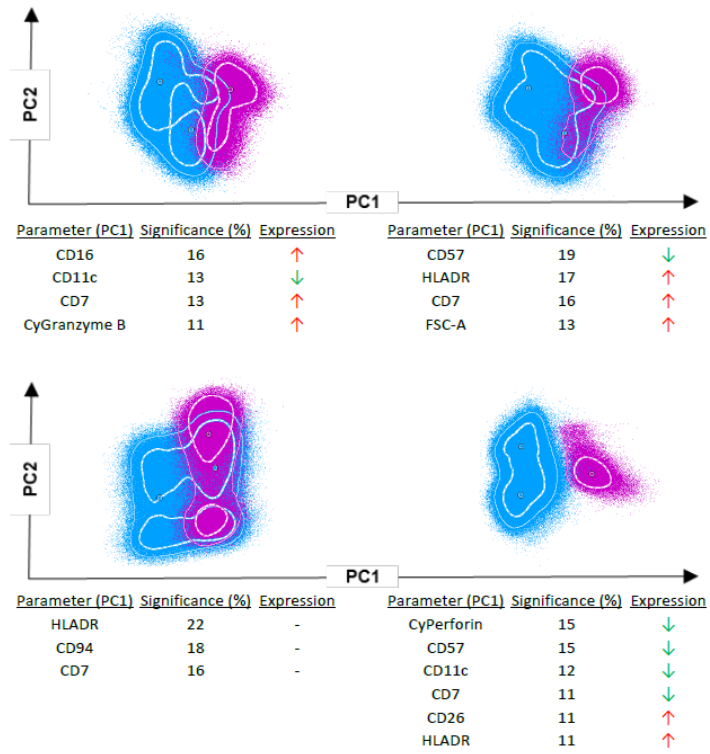

**C. TCD4<sup>+</sup>-LGLL cell populations**

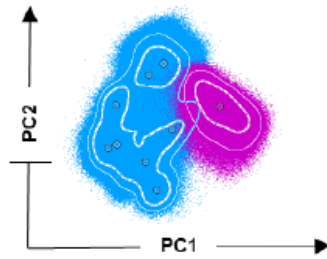

| Parameter (PC1)                                                 | Significance (%) | Expression |
|-----------------------------------------------------------------|------------------|------------|
| CD45RO                                                          | 27               | ↓          |
| CD2                                                             | 12               | ↓          |
| CyPerforin                                                      | 8.8              | ↑          |
| CD94                                                            | 7.7              | ↑          |
| CD16                                                            | 6.3              | ↑          |
| CD11c                                                           | 6.0              | ↑          |
| CD57 and CyGranzyme B not valuable (excluded from the analysis) |                  |            |

**D. Tαβ<sup>+</sup>DN-LGLL cell populations**

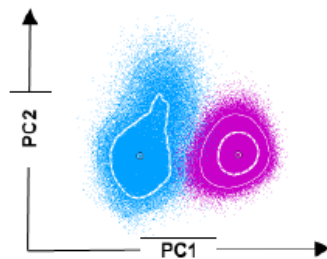

| Parameter (PC1)                                | Significance (%) | Expression |
|------------------------------------------------|------------------|------------|
| CD16                                           | 16               | ↓          |
| CD8                                            | 13               | ↓          |
| CD45RA                                         | 12               | ↑          |
| HLADR                                          | 9.2              | ↑          |
| CD11c                                          | 8.6              | ↓          |
| CD94                                           | 6.6              | ↓          |
| CD57 not valuable (excluded from the analysis) |                  |            |

**E. CD56<sup>+</sup> CLPD-NK cell populations**

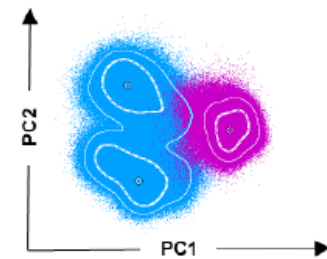

| Parameter (PC1) | Significance (%) | Expression |
|-----------------|------------------|------------|
| CD57            | 20               | ↓          |
| CD11c           | 20               | ↑          |
| CD7             | 18               | ↓          |
| CD56            | 13               | ↓          |
| CD26            | 6.5              | ↓          |
| CyGranzyme B    | 5.4              | ↑          |

**Figure S2.** Multidimensional phenotypic comparisons between wild-type and *STAT3* or *STAT5B* mutated populations of clonal LGLL cells. Comparison between each *STAT3* or *STAT5B* mutated case (in purple) vs. all non-mutated cell population(s) (coloured blue). Overexpression (↑), underexpression (↓) or non-differential expression (–) of markers in mutated vs. wild-type cell populations. In all APS1 (automatic population separator 1) graphical representations, solid circles represent median values for all phenotypic parameters evaluated, and the inner (dotted) and outer (solid) lines represent the first and the second standard deviation for each population identified.

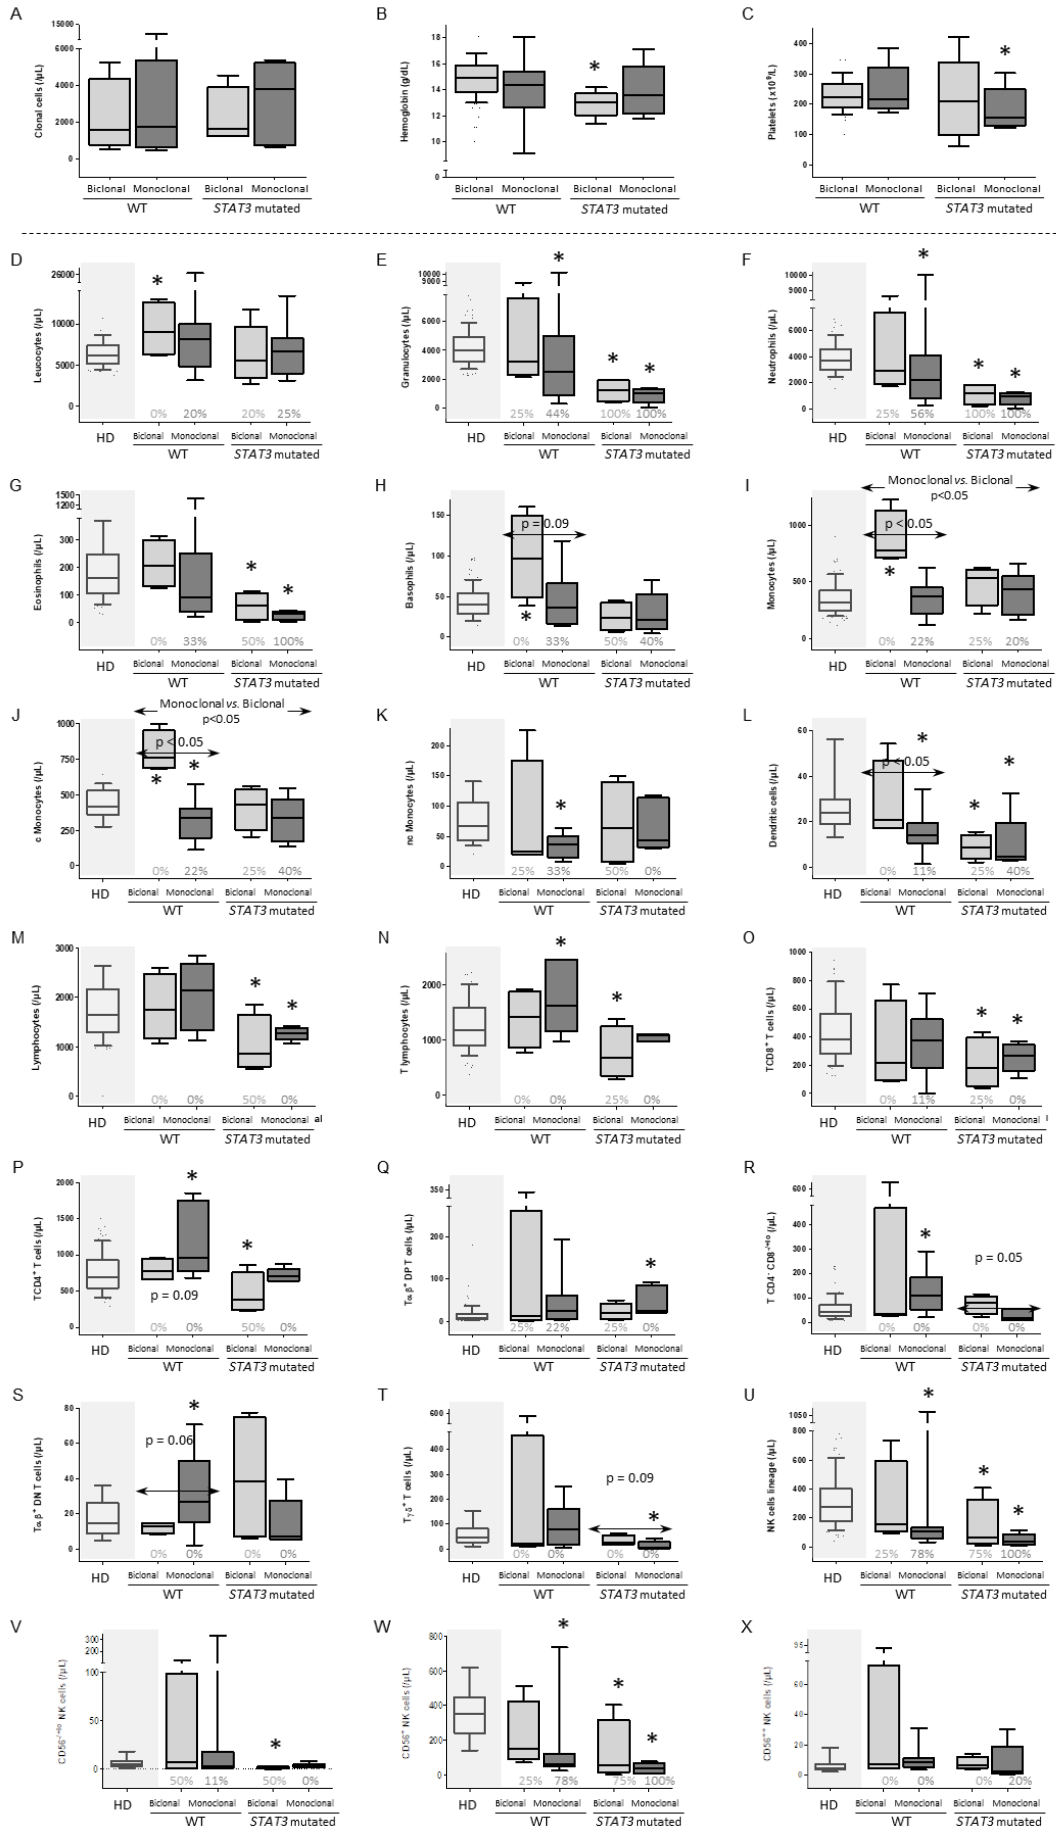

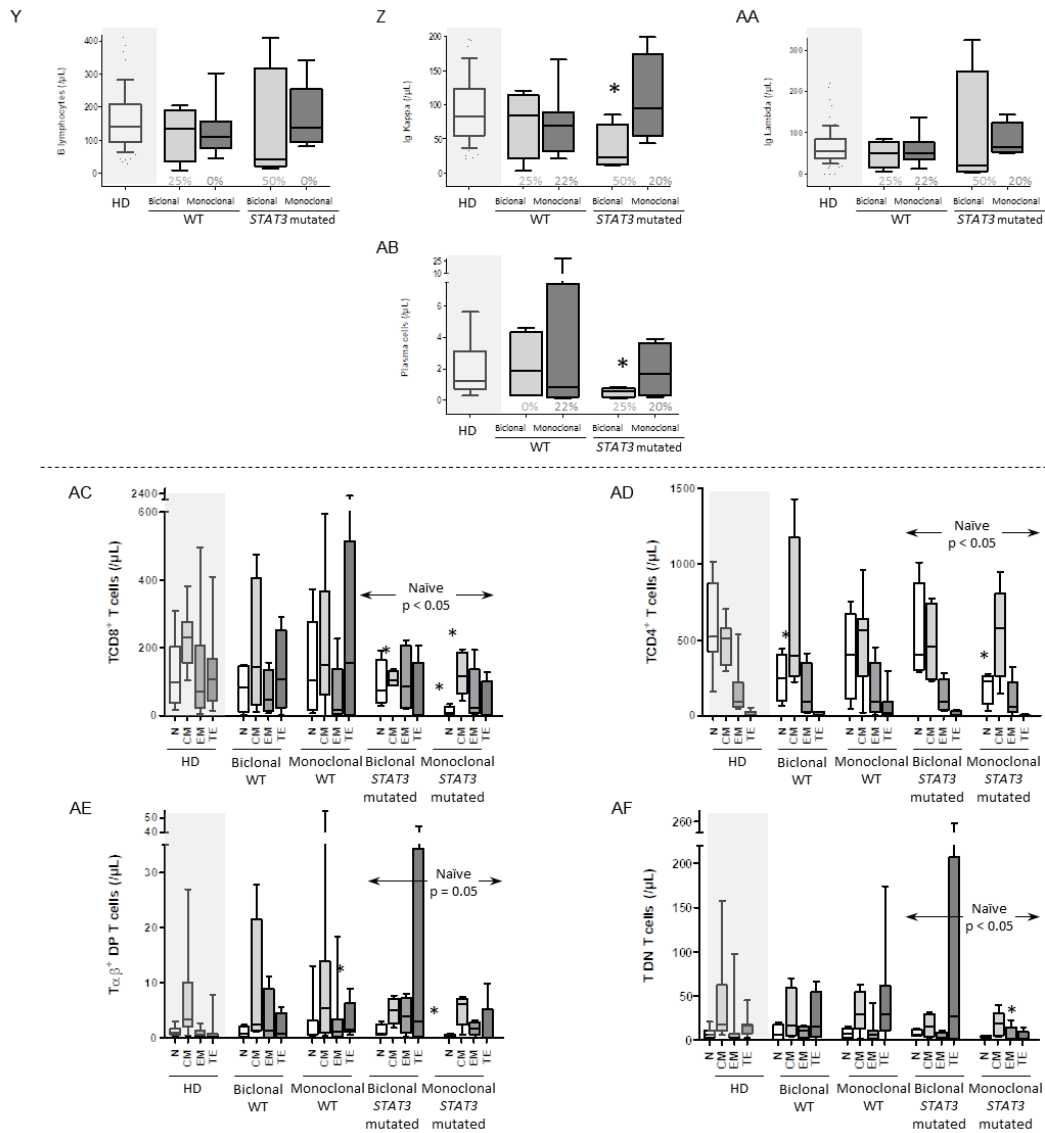

**Figure S3.** Distribution of clonal and normal residual peripheral blood cells in TCD8<sup>+</sup>–LGLL patients classified according to their *STAT3* mutational status and the presence of biclonal vs. monoclonal LGL. (**Panels A–C**): Number of clonal LGL in blood, as well as hemoglobin levels and platelet counts observed at diagnosis in TCD8<sup>+</sup>–LGLL patients according to their *STAT3* mutational status and the presence of bi(multi) vs. mono-clonality. (**Panels D–AB**): Distribution of normal leukocyte subsets in TCD8<sup>+</sup>–LGLL patients according to their *STAT3* mutational status and the presence of bi(multi) vs. mono-clonality. (**Panels AC–AF**): Distribution of normal residual T–cells at different maturational stages in TCD8<sup>+</sup>–LGLL patients classified according to their *STAT3* mutational status and the presence of bi(multi) vs. mono-clonality. Distribution of clonal and normal residual peripheral blood cell counts in bi(multi)clonal WT (*n* = 4), monoclonal WT (*n* = 9), bi(multi)clonal *STAT3*–mutated (*n* = 4) and monoclonal *STAT3*–mutated cases (*n* = 5) with at least one expanded clone of TCD8<sup>+</sup>–LGL cells vs. aged–matched HD (*n* = 638, including 628 for comparisons of the distribution of residual normal immune cells and 10 for comparisons of the maturation–associated cell subsets of major normal residual T–cell populations). Notched boxes represent 25th and 75th percentile values; the lines in the middle correspond to median values (50th percentile) and vertical lines represent 10<sup>th</sup> and 90<sup>th</sup> percentile values. The number under the boxes means the percentage of cases that have lower values than the minimum value observed among HD. \**p*–value ≤ 0.05 vs. HD. Abbreviations (alphabetical order): C, classical; CM, central memory; EM, effector memory; HD, healthy donors; LGL, large granular lymphocytes; LGLL, leukemia of LGL; N, naïve; NC, non–classical; *p*, *p*–value; TE, terminal effector; WT, wild–type.

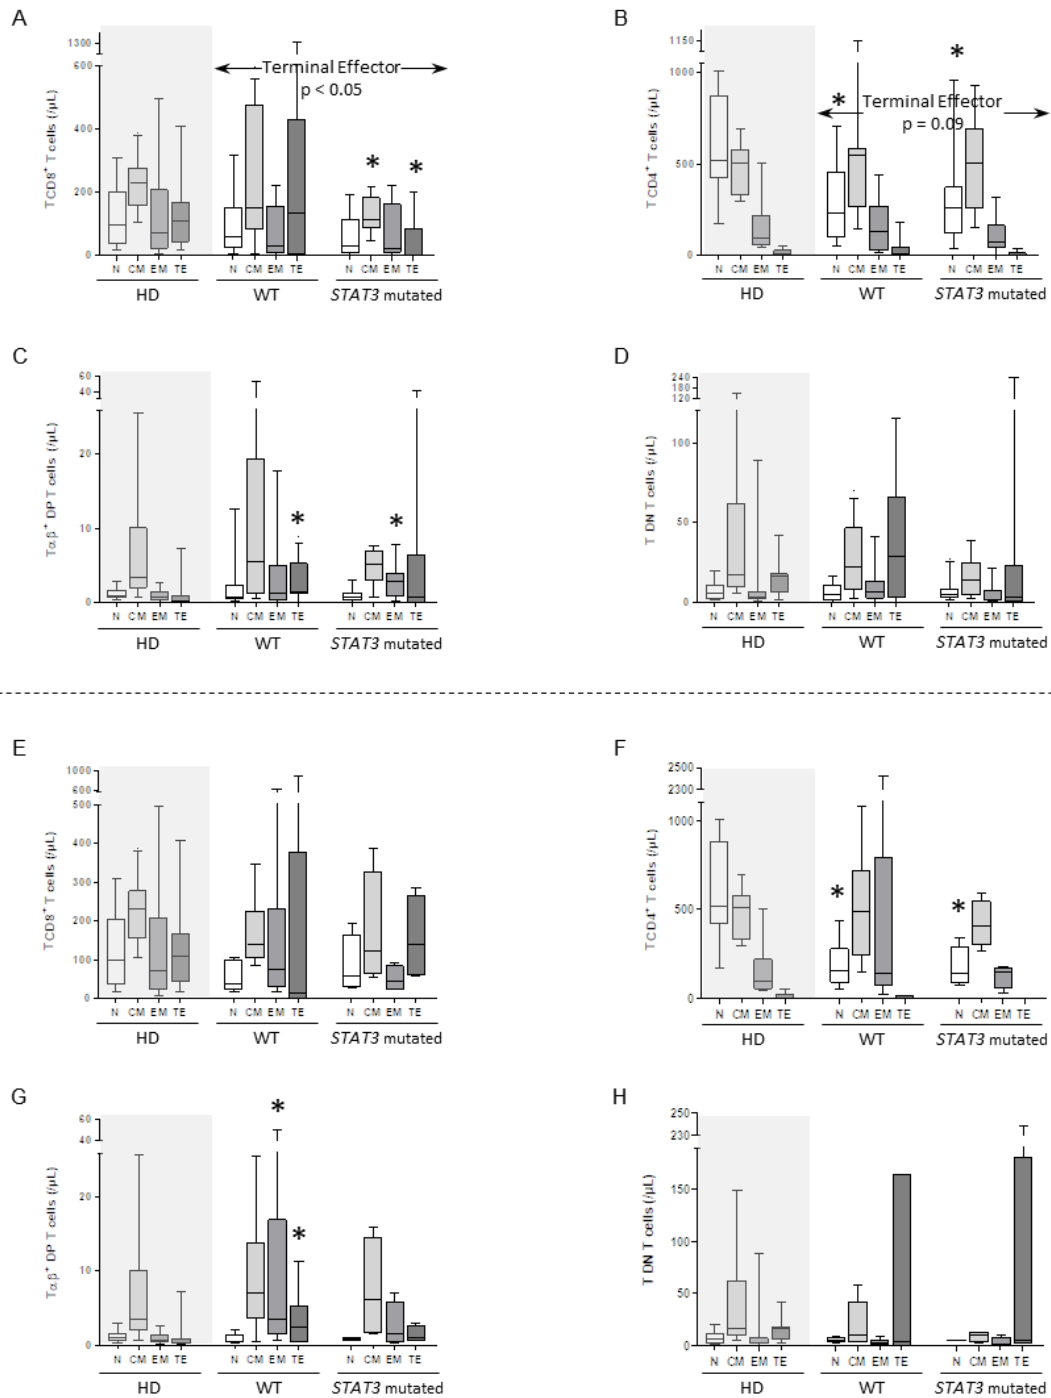

**Figure S4.** Distribution of distinct maturation-associated cell subsets for the major normal residual T cells in WT vs. *STAT3*-mutated vs. age-matched HD in TCD8<sup>+</sup>- and Tγδ<sup>+</sup>-LGLL. (**Panels A–D**): Distribution of normal residual T cells at different maturational stages in TCD8<sup>+</sup>-LGLL patients classified according to their *STAT3* mutational status. (**Panels E–H**): Distribution of normal residual T-cells at different maturational stages in Tγδ<sup>+</sup>-LGLL patients classified according to their *STAT3* mutational status. Distribution of clonal and normal residual peripheral blood cell counts in WT (*n* = 15 and *n* = 6) and *STAT3* mutated (*n* = 10 and *n* = 4) vs. aged-matched HD (*n* = 10) for TCD8<sup>+</sup>-LGLL and Tγδ<sup>+</sup>-LGLL patients. Notched boxes represent 25th and 75th percentile values; the lines in the middle correspond to median values (50th percentile) and vertical lines represent 10<sup>th</sup> and 90<sup>th</sup> percentile values. \**p*-value ≤ 0.05 vs. HD. Abbreviations (alphabetical order): CM, central memory; EM, effector memory; HD, healthy donors; LGL, large granular lymphocytes; LGLL, leukemia of LGL; N, naïve; *p*, *p*-value; TE, terminal effector; WT, wild-type.

### A. Clonal TCD8<sup>+</sup>-LGL cells

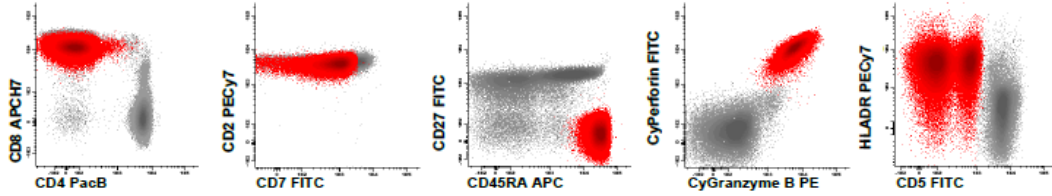

### B. Clonal TCD4<sup>+</sup>-LGL cells

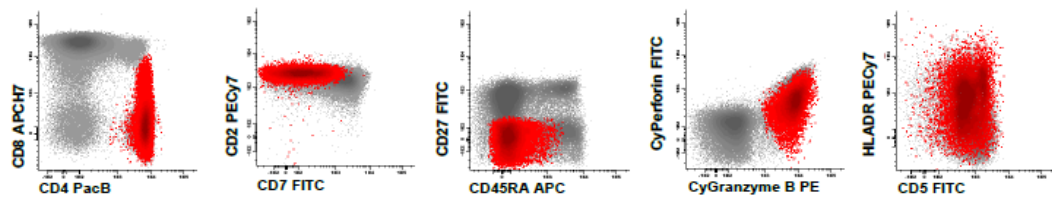

### C. Clonal Tαβ<sup>+</sup>DN-LGL cells

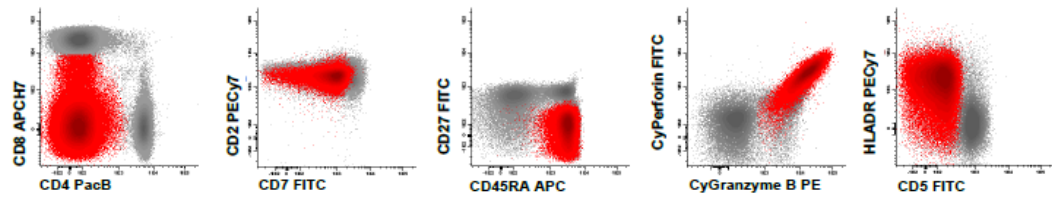

### D. Clonal Tγδ<sup>+</sup>-LGL cells

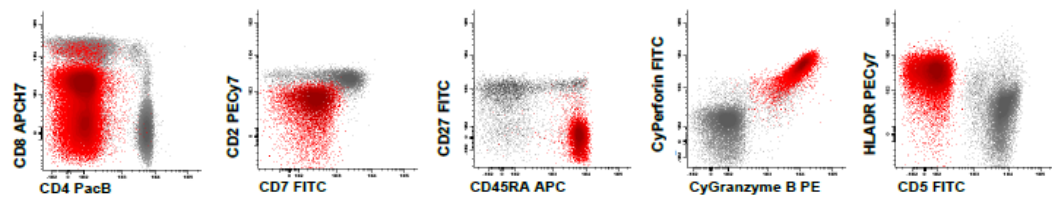

**Figure S5.** Phenotypic identification of distinct subtypes of aberrant clonal LGL of different T-cell lineages in T-LGLL patients. Red events correspond to the distinct populations of clonal T cells identified as different from all other normal residual T lymphocytes (gray dots). Selection of clonal T-cells was based on their CD2/CD7 (aberrant) profile and their cytotoxic (cyGranzyme<sup>+</sup> and cyPerforin<sup>+</sup>) effector memory/terminal effector (CD27<sup>-</sup> and CD45RA<sup>+lo/+</sup>) phenotype. In all panels, only T cells (CD3<sup>+</sup> events) are displayed. Abbreviations (alphabetical order): LGL, large granular lymphocytes; LGLL, leukemia of LGL.

### A. Clonal NK CD56<sup>-/lo</sup> LGL cells

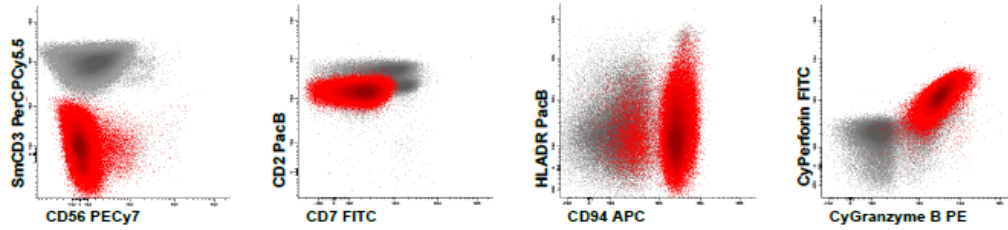

### B. Clonal NK CD56<sup>+/+</sup> LGL cells

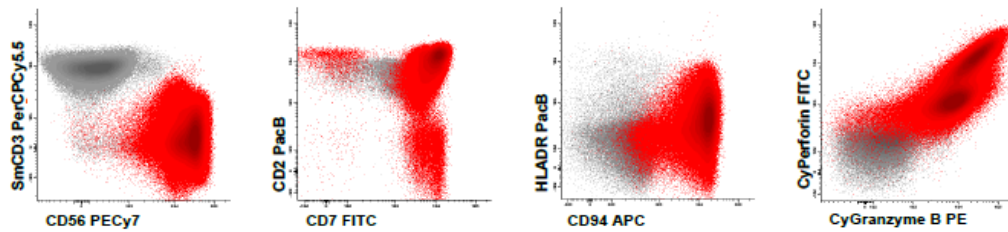

**Figure S6.** Phenotypic identification of distinct subtypes of aberrant clonal NK-cells in CLPD–NK patients. Red events correspond to distinct populations of (mono) clonal NK cells after their discrimination from all other T/NK lymphocytes (gray dots). Pathological NK–LGL cells were selected based on their CD2/CD7 aberrant phenotypic profile and their cytotoxic phenotype (CD94<sup>-lo/+</sup>, cyGranzyme<sup>+</sup> and cyPerforin<sup>+</sup>). In all panels, only T cells (CD3<sup>+</sup> events) and NK cells are displayed. Abbreviations (alphabetical order): LGL, large granular lymphocytes; CLPD–NK: chronic lymphoproliferative disorders of NK cells.



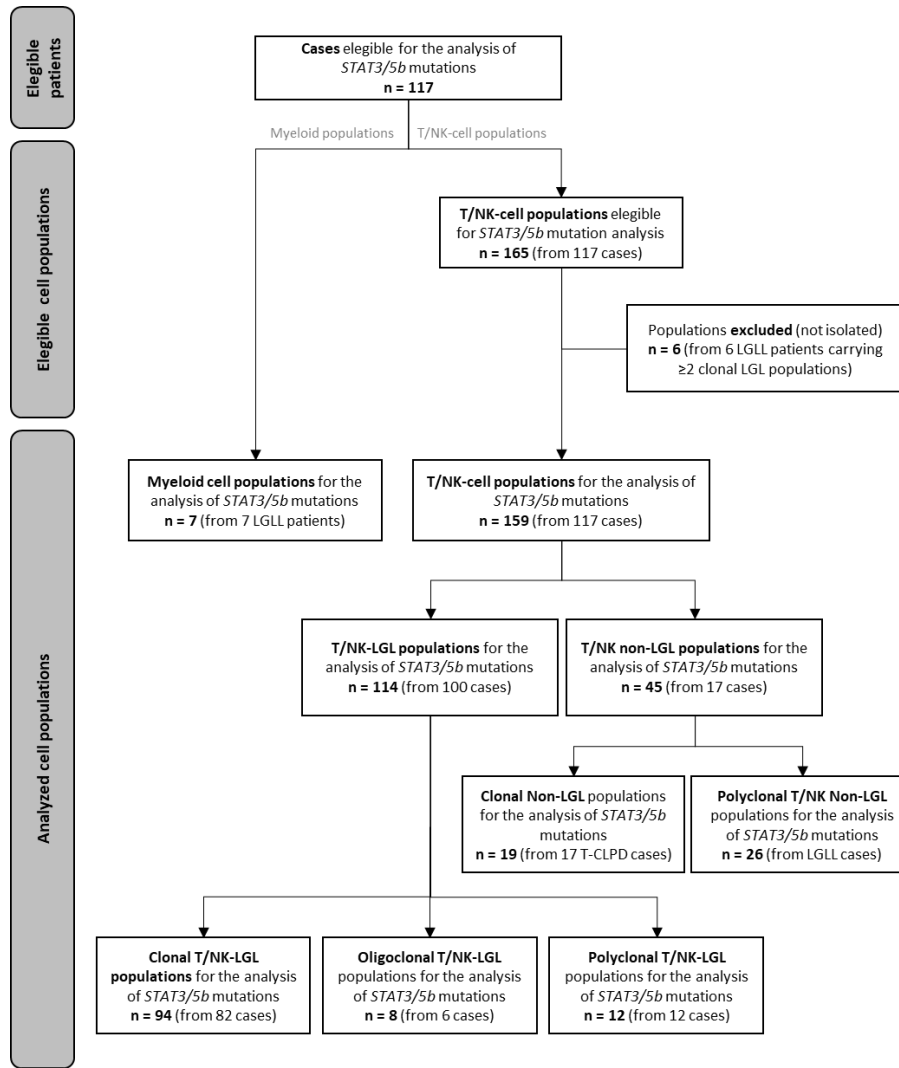

**Figure S7.** Flow-chart illustrating how the cases and cell populations were selected for the analysis of *STAT3* and *STAT5B* mutations.

**Table S1.** Distribution of *STAT3* or *STAT5B* –mutated T-LGL cell populations according to the T-cell receptor beta chain variable region (TCR-V $\beta$ ) or T-cell receptor gamma 9 and delta 2 chain region (TCR-V $\gamma$ 9 and TCR-V $\delta$ 2) expressed.

| TCR-V Family                                            | N. <i>STAT3/5B</i> -Mutated/Total Clonal T-LGL Cell Populations | % of <i>STAT3/5B</i> -Mutated/Total Clonal T-LGL Cell Populations |
|---------------------------------------------------------|-----------------------------------------------------------------|-------------------------------------------------------------------|
| TCR-V $\beta$ 1                                         | 1/1                                                             | 100%                                                              |
| TCR-V $\beta$ 3                                         | 0/4                                                             | 0%                                                                |
| TCR-V $\beta$ 5.1                                       | 2/8                                                             | 25%                                                               |
| TCR-V $\beta$ 7.1                                       | 0/1                                                             | 0%                                                                |
| TCR-V $\beta$ 7.2                                       | 0/2                                                             | 0%                                                                |
| TCR-V $\beta$ 8                                         | 1/2                                                             | 50%                                                               |
| TCR-V $\beta$ 11                                        | 0/1                                                             | 0%                                                                |
| TCR-V $\beta$ 12                                        | 0/1                                                             | 0%                                                                |
| TCR-V $\beta$ 13.1                                      | 3/8                                                             | 38%                                                               |
| TCR-V $\beta$ 13.2                                      | 2/2                                                             | 100%                                                              |
| TCR-V $\beta$ 13.6                                      | 1/5                                                             | 20%                                                               |
| TCR-V $\beta$ 14                                        | 1/3                                                             | 33%                                                               |
| TCR-V $\beta$ 16                                        | 0/1                                                             | 0%                                                                |
| TCR-V $\beta$ 18                                        | 0/1                                                             | 0%                                                                |
| TCR-V $\beta$ 22                                        | 1/3                                                             | 33%                                                               |
| TCR-V $\beta$ 23                                        | 0/1                                                             | 0%                                                                |
| TCR-V $\beta$ NI                                        | 2/10                                                            | 20%                                                               |
| TCR-V $\gamma$ 9-V $\delta$ 2 <sup>-</sup>              | 1/8                                                             | 13%                                                               |
| TCR-V $\gamma$ 9 <sup>+</sup> V $\delta$ 2 <sup>-</sup> | 1/1                                                             | 100%                                                              |
| TCR-V $\gamma$ 9 <sup>+</sup> V $\delta$ 2 <sup>+</sup> | 0/2                                                             | 0%                                                                |

No cases with TCR-V $\beta$ 2, TCR-V $\beta$ 4, TCR-V $\beta$ 5.2, TCR-V $\beta$ 5.3, TCR-V $\beta$ 9, TCR-V $\beta$ 12, TCR-V $\beta$ 16, TCR-V $\beta$ 17, TCR-V $\beta$ 20, TCR-V $\beta$ 21.3 and TCR-V $\gamma$ 9-V $\delta$ 2<sup>+</sup> were identified. Abbreviations (alphabetical order): N., number; NI, TCR-V $\beta$  family not identified with the IOTest® TCR-V $\beta$  Kit (Beckman Coulter).

**Table S2.** Distribution of normal PB leukocyte subsets in T-LGLL according to their *STAT3* or *STAT5B* mutational status.

| Cell Populations      | Age-Matched HD<br>( <i>n</i> = 628) | T-LGLL                                                    |                                                           | <i>p</i> -Value                              |
|-----------------------|-------------------------------------|-----------------------------------------------------------|-----------------------------------------------------------|----------------------------------------------|
|                       |                                     | Wild-Type <i>STAT3</i> and <i>STAT5B</i> ( <i>n</i> = 28) | <i>STAT3</i> or <i>STAT5B</i><br>Mutated ( <i>n</i> = 14) |                                              |
| Granulocytes (/μL)    | <b>3977 (1678–8717)</b>             | <b>2503 (298–10264)</b>                                   | <b>1308 (46–6676)</b>                                     | ≤0.01 <sup>abc</sup>                         |
| Neutrophils           | <b>3709 (1563–8542)</b>             | <b>2301 (263–10072)</b>                                   | <b>1217 (39–4974)</b>                                     | ≤0.02 <sup>abc</sup>                         |
| Eosinophils           | <b>161 (0–876)</b>                  | <b>143 (8.4–1402)</b>                                     | <b>30 (1.5–1250)</b>                                      | ≤0.05 <sup>abc</sup>                         |
| Basophils             | <b>41 (2.2–222)</b>                 | <b>51 (7.7–161)</b>                                       | 32 (4.3–452)                                              | 0.05 <sup>a</sup> ; 0.08 <sup>c</sup>        |
| Monocytes (/μL)       | <b>320 (66–1247)</b>                | <b>462 (23–1522)</b>                                      | 443 (150–972)                                             | <b>0.0005<sup>a</sup></b>                    |
| cMO                   | 419 (215–1063)                      | 406 (13–1426)                                             | 366 (128–838)                                             | NS                                           |
| ncMO                  | <b>67 (20–166)</b>                  | <b>38 (8.4–225)</b>                                       | 52 (4.5–149)                                              | <b>0.01<sup>a</sup></b>                      |
| Dendritic cells (/μL) | <b>24 (4.1–124)</b>                 | 17 (0.48–54)                                              | <b>8.2 (2–105)</b>                                        | <b>0.007<sup>b</sup></b> ; 0.09 <sup>c</sup> |
| Lymphocytes (/μL)     | <b>1653 (0–5947)</b>                | <b>2084 (943–7547)</b>                                    | <b>1293 (553–4446)</b>                                    | ≤0.03 <sup>abc</sup>                         |
| T lymphocytes (/μL)   | <b>1188 (371–5298)</b>              | <b>1672 (655–6469)</b>                                    | <b>1097 (291–4039)</b>                                    | <b>0.02<sup>ac</sup></b>                     |
| TCD8 <sup>+</sup>     | <b>386 (13–2199)</b>                | 463 (0–3133)                                              | <b>278 (38–2120)</b>                                      | <b>0.05<sup>b</sup></b> ; 0.08 <sup>c</sup>  |
| TCD4 <sup>+</sup>     | <b>695 (106–3224)</b>               | <b>970 (88–3994)</b>                                      | <b>681 (227–2221)</b>                                     | ≤0.03 <sup>ac</sup>                          |
| Tαβ <sup>+</sup> DP   | <b>8.6 (0–180)</b>                  | <b>28 (2.2–341)</b>                                       | <b>24 (3.3–93)</b>                                        | ≤0.001 <sup>ab</sup>                         |
| Tαβ <sup>+</sup> DN   | 15 (2–117)                          | 16 (2.2–71)                                               | 9.9 (5.3–77)                                              | NS                                           |
| Tγδ <sup>+</sup>      | <b>47 (1–765)</b>                   | <b>33 (0–598)</b>                                         | <b>14 (0–265)</b>                                         | ≤0.03 <sup>bc</sup>                          |
| NK cells (/μL)        | <b>279 (0–1215)</b>                 | <b>150 (12–1383)</b>                                      | <b>62 (7.4–408)</b>                                       | ≤0.01 <sup>abc</sup>                         |
| CD56 <sup>-/lo</sup>  | 5.2 (1.1–19)                        | 2.6 (0.16–328)                                            | 2.6 (0–44)                                                | NS                                           |
| CD56 <sup>+</sup>     | <b>350 (116–773)</b>                | <b>144 (10–1372)</b>                                      | <b>52 (0–403)</b>                                         | ≤0.003 <sup>abc</sup>                        |
| CD56 <sup>++</sup>    | 4.5 (1.4–25)                        | 6.8 (1.3–93)                                              | 6.6 (0.36–30)                                             | NS                                           |
| B lymphocytes (/μL)   | 141 (8.1–867)                       | 169 (9.9–970)                                             | 161 (15–409)                                              | NS                                           |
| Plasma cells (/μL)    | 1.3 (0.104–14)                      | 1.2 (0.091–28)                                            | 0.61 (0–14)                                               | NS                                           |

Results expressed as median (range) values. In bold: statistically significant differences ( $p$ -value ≤ 0.05). <sup>a</sup>HD vs. WT cases; <sup>b</sup>HD vs. *STAT3*-mutated cases; <sup>c</sup>*STAT3*-mutated vs. WT cases. Abbreviations (alphabetical order): HD, healthy donors; c, classical; T-LGLL, T-cell large granular lymphocytic leukemia; MO, monocytes; nc, non-classical; NS, no statistically significant differences ( $p$ -value > 0.05); PB, peripheral blood; WT, wild-type.

**Table S3.** Distribution of normal PB leukocyte subsets in TCD8<sup>+</sup>-LGLL according to their *STAT3* mutational status.

| Cell Populations      | Age-Matched HD<br>( <i>n</i> = 628) | TCD8 <sup>+</sup> -LGLL                    |                                          | <i>p</i> -Value                             |
|-----------------------|-------------------------------------|--------------------------------------------|------------------------------------------|---------------------------------------------|
|                       |                                     | Wild-Type <i>STAT3</i><br>( <i>n</i> = 15) | <i>STAT3</i> Mutated<br>( <i>n</i> = 10) |                                             |
| Granulocytes (/μL)    | <b>3977 (1678–8717)</b>             | <b>2690 (298–10264)</b>                    | <b>1124 (46–2003)</b>                    | ≤0.02 <sup>abc</sup>                        |
| Neutrophils           | <b>3709 (1563–8542)</b>             | <b>2298 (263–10072)</b>                    | <b>1052 (39–1903)</b>                    | ≤0.01 <sup>abc</sup>                        |
| Eosinophils           | <b>161 (0–876)</b>                  | <b>140 (20–1402)</b>                       | <b>30 (1.5–112)</b>                      | ≤0.003 <sup>bc</sup>                        |
| Basophils             | 41 (2.2–222)                        | 40 (14–161)                                | 28 (4.3–70)                              | 0.07 <sup>b</sup> ; 0.06 <sup>c</sup>       |
| Monocytes (/μL)       | <b>320 (66–1247)</b>                | <b>401 (119–1223)</b>                      | 472 (163–662)                            | <b>0.03<sup>a</sup></b> ; 0.08 <sup>b</sup> |
| cMO                   | 419 (215–1063)                      | 342 (111–998)                              | 388 (134–584)                            | NS                                          |
| ncMO                  | <b>67 (20–166)</b>                  | <b>28 (8.4–225)</b>                        | 52 (4.5–149)                             | <b>0.005<sup>a</sup></b>                    |
| Dendritic cells (/μL) | <b>24 (4.1–124)</b>                 | <b>17 (1.2–54)</b>                         | <b>7.6 (2–32)</b>                        | ≤0.04 <sup>ab</sup> ; 0.07 <sup>c</sup>     |
| Lymphocytes (/μL)     | <b>1653 (0–5947)</b>                | <b>2033 (1068–3362)</b>                    | <b>1257 (553–4446)</b>                   | <b>0.02<sup>bc</sup></b>                    |
| T lymphocytes (/μL)   | <b>1188 (371–5298)</b>              | <b>1624 (780–2467)</b>                     | <b>1033 (291–4039)</b>                   | ≤0.02 <sup>ab</sup>                         |
| TCD8 <sup>+</sup>     | <b>386 (13–2199)</b>                | 326 (0–773)                                | <b>278 (38–2120)</b>                     | <b>0.04<sup>b</sup></b>                     |
| TCD4 <sup>+</sup>     | <b>695 (106–3224)</b>               | <b>962 (656–1853)</b>                      | <b>673 (227–1872)</b>                    | ≤0.01 <sup>ac</sup>                         |
| Tαβ <sup>+</sup> DP   | <b>8.6 (0–180)</b>                  | <b>25 (2.2–341)</b>                        | <b>22 (3.3–93)</b>                       | ≤0.03 <sup>ab</sup>                         |
| Tαβ <sup>+</sup> DN   | 15 (2–117)                          | 15 (2.2–71)                                | 13 (5.3–77)                              | NS                                          |
| Tγδ <sup>+</sup>      | <b>47 (1–765)</b>                   | <b>29 (5.5–598)</b>                        | <b>15 (2.5–63)</b>                       | ≤0.04 <sup>bc</sup>                         |
| NK cells (/μL)        | <b>279 (0–1215)</b>                 | <b>111 (33–1383)</b>                       | <b>62 (7.4–408)</b>                      | ≤0.002 <sup>ab</sup> ; 0.06 <sup>c</sup>    |
| CD56 <sup>-/+lo</sup> | 5.2 (1.1–19)                        | 2.4 (0.56–328)                             | 2.5 (0–44)                               | NS                                          |
| CD56 <sup>+</sup>     | <b>350 (116–773)</b>                | <b>89 (25–1372)</b>                        | <b>54 (0–403)</b>                        | ≤0.03 <sup>abc</sup>                        |
| CD56 <sup>++</sup>    | <b>4.5 (1.4–25)</b>                 | <b>8.5 (3.4–93)</b>                        | 6.3 (0.46–30)                            | <b>0.05<sup>a</sup></b>                     |
| B lymphocytes (/μL)   | 141 (8.1–867)                       | 118 (9.9–303)                              | 122 (15–409)                             | NS                                          |
| Plasma cells (/μL)    | 1.3 (0.104–14)                      | 0.86 (0.091–28)                            | 0.58 (0–14)                              | NS                                          |

Results expressed as median (range) values. In bold: statistically significant differences (*p*-value ≤ 0.05). <sup>a</sup>HD vs. WT cases; <sup>b</sup>HD vs. *STAT3*-mutated cases; <sup>c</sup>*STAT3*-mutated vs. WT cases. Abbreviations (alphabetical order): HD, healthy donors; c, classical; T-LGLL, T-cell large granular lymphocytic leukemia; MO, monocytes; nc, non-classical; NS, no statistically significant differences (*p*-value > 0.05); PB, peripheral blood; WT, wild-type.

**Table S4.** Distribution of normal PB leukocyte subsets in T $\gamma\delta^+$ -LGLL according to their STAT3 mutational status.

| Cell Populations      | Age-Matched HD<br>( <i>n</i> = 628) | T $\gamma\delta^+$ -LGLL           |                                  | <i>p</i> -Value                          |
|-----------------------|-------------------------------------|------------------------------------|----------------------------------|------------------------------------------|
|                       |                                     | Wild-Type STAT3<br>( <i>n</i> = 6) | STAT3 Mutated<br>( <i>n</i> = 4) |                                          |
| Granulocytes (/μL)    | 3977 (1678–8717)                    | 3171 (643–4945)                    | 2007 (343–6676)                  | 0.08 <sup>b</sup>                        |
| Neutrophils           | <b>3709 (1563–8542)</b>             | 3045 (590–4702)                    | <b>1950 (295–4974)</b>           | <b>0.05<sup>b</sup></b>                  |
| Eosinophils           | 161 (0–876)                         | 161 (8.4–291)                      | 29 (20–1250)                     | NS                                       |
| Basophils             | 41 (2.2–222)                        | 55 (7.7–103)                       | 32 (21–452)                      | NS                                       |
| Monocytes (/μL)       | 320 (66–1247)                       | 466 (23–1522)                      | 453 (286–972)                    | 0.1 <sup>a</sup>                         |
| cMO                   | 419 (215–1063)                      | 403 (13–1426)                      | 366 (241–838)                    | NS                                       |
| ncMO                  | 67 (20–166)                         | 65 (9.8–96)                        | 87 (45–133)                      | NS                                       |
| Dendritic cells (/μL) | 24 (4.1–124)                        | 22 (0.48–39)                       | 37 (5.6–105)                     | NS                                       |
| Lymphocytes (/μL)     | 1653 (0–5947)                       | 2733 (943–7546)                    | 1117 (713–3696)                  | NS                                       |
| T lymphocytes (/μL)   | 1188 (371–5298)                     | 2224 (655–6469)                    | 885 (291–3349)                   | 0.08 <sup>a</sup>                        |
| TCD8 <sup>+</sup>     | <b>386 (13–2199)</b>                | <b>529 (493–2815)</b>              | 138 (38–1043)                    | <b>0.02<sup>a</sup>; 0.1<sup>b</sup></b> |
| TCD4 <sup>+</sup>     | 695 (106–3224)                      | 1488 (88–3595)                     | 546 (227–2221)                   | NS                                       |
| Tαβ <sup>+</sup> DP   | 8.6 (0–180)                         | 36 (5.5–79)                        | 35 (3.3–67)                      | 0.07 <sup>a</sup>                        |
| Tαβ <sup>+</sup> DN   | 15 (2–117)                          | 20 (5.4–42)                        | 6.9 (6–60)                       | NS                                       |
| T $\gamma\delta^+$    | 47 (1–765)                          | 31 (0–121)                         | 15 (0–265)                       | NS                                       |
| NK cells (/μL)        | 279 (0–1215)                        | 265 (12–1315)                      | 94 (23–408)                      | 0.06 <sup>b</sup>                        |
| CD56 <sup>-/+io</sup> | 5.2 (1.1–19)                        | 4.1 (0.16–6.5)                     | 9 (0.94–18)                      | NS                                       |
| CD56 <sup>+</sup>     | <b>350 (116–773)</b>                | 253 (10–1294)                      | <b>69 (21–403)</b>               | <b>0.04<sup>b</sup></b>                  |
| CD56 <sup>++</sup>    | 4.5 (1.4–25)                        | 7.8 (1.3–15)                       | 4.9 (0.36–8.8)                   | NS                                       |
| B lymphocytes (/μL)   | 141 (8.1–867)                       | 237 (13–748)                       | 196 (15–209)                     | NS                                       |
| Plasma cells (/μL)    | 1.3 (0.104–14)                      | 2.6 (0.3–7.7)                      | 1.1 (0.053–5)                    | NS                                       |

Results expressed as median (range) values. In bold: statistically significant differences (*p*-value  $\leq$  0.05). <sup>a</sup>HD vs. WT cases; <sup>b</sup>HD vs. STAT3-mutated cases. Abbreviations (alphabetical order): HD, healthy donors; c, classical; LGLL, leukemia of large granular lymphocytes; MO, monocytes; nc, non-classical; NS, no statistically significant differences (*p*-value  $>$  0.05); PB, peripheral blood; WT, wild-type.

**Table S5.** Distribution of normal PB leukocyte subsets in CLPD-NK according to their STAT3 mutational status.

| Cell Populations   | Age-Matched HD<br>( <i>n</i> = 628) | CLPD-NK                            |                                  | <i>p</i> -Value           |
|--------------------|-------------------------------------|------------------------------------|----------------------------------|---------------------------|
|                    |                                     | Wild-Type STAT3<br>( <i>n</i> = 4) | STAT3 Mutated<br>( <i>n</i> = 5) |                           |
| Granulocytes (/μL) | 3977 (1678–8717)                    | 2672 (1180–6341)                   | 1078 (679–4625)                  | 0.006 <sup>b</sup>        |
| Neutrophils        | <b>3709 (1563–8542)</b>             | 2512 (968–6112)                    | <b>1008 (671–4437)</b>           | <b>0.006<sup>b</sup></b>  |
| Eosinophils        | <b>161 (0–876)</b>                  | <b>139 (70–177)</b>                | <b>6.1 (1.5–97)</b>              | $\leq$ 0.03 <sup>bc</sup> |

|                       |                       |                        |                      |                                                  |
|-----------------------|-----------------------|------------------------|----------------------|--------------------------------------------------|
| Basophils             | 41 (2.2–222)          | 59 (35–82)             | 32 (6.4–90)          | NS                                               |
| Monocytes (/μL)       | 320 (66–1247)         | 411 (359–645)          | 338 (198–1783)       | NS (0.09 <sup>a</sup> )                          |
| cMO                   | 419 (215–1063)        | 376 (301–534)          | 301 (198–1778)       | NS                                               |
| ncMO                  | <b>67 (20–166)</b>    | 63 (0–111)             | <b>5.2 (0.49–37)</b> | <b>0.001<sup>b</sup></b>                         |
| Dendritic cells (/μL) | <b>24 (4.1–124)</b>   | 17 (0–21)              | <b>3.1 (0.7–13)</b>  | <b>0.0008<sup>b</sup>; NS (0.06<sup>a</sup>)</b> |
| Lymphocytes (/μL)     | 1653 (0–5947)         | 2283 (1253–3575)       | 1445 (553–3165)      | NS                                               |
| T lymphocytes (/μL)   | 1188 (371–5298)       | 1704 (983–2950)        | 1340 (502–3079)      | NS                                               |
| TCD8 <sup>+</sup>     | 386 (13–2199)         | 411 (150–1424)         | 404 (82–899)         | NS                                               |
| TCD4 <sup>+</sup>     | <b>695 (106–3224)</b> | <b>1021 (793–1667)</b> | 682 (285–1884)       | <b>0.05<sup>a</sup></b>                          |
| Tαβ <sup>+</sup> DP   | <b>8.6 (0–180)</b>    | 34 (4.2–120)           | <b>21 (7.2–200)</b>  | <b>0.03<sup>b</sup></b>                          |
| Tαβ <sup>+</sup> DN   | 15 (2–117)            | 17 (11–94)             | 28 (10–104)          | NS                                               |
| Tγδ <sup>+</sup>      | 47 (1–765)            | 14 (4.8–82)            | 30 (4.8–68)          | NS                                               |
| NK cells (/μL)        | <b>279 (0–1215)</b>   | 139 (2–691)            | <b>15 (0–46)</b>     | <b>0.0001<sup>b</sup></b>                        |
| CD56 <sup>-/+lo</sup> | 5.2 (1.1–19)          | 6.7 (0–16)             | 0 (0–13)             | NS                                               |
| CD56 <sup>+</sup>     | <b>350 (116–773)</b>  | 102 (0–664)            | <b>0 (0–19)</b>      | <b>0.0004<sup>b</sup></b>                        |
| CD56 <sup>++</sup>    | 4.5 (1.4–25)          | 22 (2–31)              | 3 (0–46)             | NS                                               |
| B lymphocytes (/μL)   | 141 (8.1–867)         | 242 (60–540)           | 90 (44–251)          | NS                                               |
| Plasma cells (/μL)    | 1.3 (0.104–14)        | 1.4 (0.16–2.1)         | 1.4 (0.085–13)       | NS                                               |

Results expressed as median (range) values. In bold: statistically significant differences ( $p$ -value  $\leq 0.05$ ). <sup>a</sup>HD vs. WT cases; <sup>b</sup>HD vs. *STAT3*-mutated cases; <sup>c</sup>*STAT3*-mutated vs. WT cases. Abbreviations (alphabetical order): HD, healthy donors; c, classical; CLPD-NK, chronic lymphoproliferative disorders of NK cells; MO, monocytes; nc, non-classical; NS, no statistically significant differences ( $p$ -value  $> 0.05$ ); PB, peripheral blood; WT, wild-type.

**Table S6.** Clinical and biological features of clonal T-LGLL cases with wild-type (WT) vs. mutated *STAT3/5B*.

| Clinical and Biological Features                                     | T-LGLL                             |                                  |              |
|----------------------------------------------------------------------|------------------------------------|----------------------------------|--------------|
|                                                                      | Wild-Type <i>STAT3/5B</i> (n = 44) | <i>STAT3/5B</i> Mutated (n = 23) | p-Value      |
| Sex (male/female)*                                                   | 22/22 (50%/50%)                    | 10/13 (43%/57%)                  | NS           |
| Age (years)                                                          | 61 ± 17 (15–92)                    | 62 ± 14 (40–90)                  | NS           |
| Physical examination                                                 |                                    |                                  |              |
| Organomegalies* <sup>1</sup>                                         | 5/32 (16%)                         | 7/22 (32%)                       | NS           |
| Skin lesions*                                                        | 3/31 (10%) <sup>2</sup>            | 0/20 (0%)                        | NS           |
| Peripheral blood cell counts                                         |                                    |                                  |              |
| Hemoglobin (g/dL)                                                    | 13 ± 2.2 (8.3–18)                  | 13 ± 2.1 (8.5–17)                | NS           |
| Platelets (×10 <sup>9</sup> /L)                                      | <b>246 ± 74 (98–383)</b>           | <b>201 ± 88 (25–421)</b>         | <b>0.04</b>  |
| Leukocytes (×10 <sup>9</sup> /L)                                     | 8.7 ± 4.5 (2.7–28)                 | 6.8 ± 3.9 (0.9–17)               | NS (0.08)    |
| Clonal LGL cells (×10 <sup>9</sup> /L)                               | 2.5 ± 2.9 (0.07–14)                | 2.8 ± 2.1 (0.5–5.9)              | NS           |
| Low-count clonal LGL lymphocytosis (<0.5 × 10 <sup>9</sup> /L)*      | 14/39 (36%)                        | 7/23 (30%)                       | NS           |
| Very low-count clonal LGL lymphocytosis (<0.1 × 10 <sup>9</sup> /L)* | 5/39 (13%)                         | 2/23 (9%)                        | NS           |
| Cytopenias                                                           |                                    |                                  |              |
| Anemia (≤10g/dL)*                                                    | 5/39 (13%)                         | 3/22 (14%)                       | NS           |
| Thrombocytopenia (≤100 × 10 <sup>9</sup> /L)*                        | 1/38 (3%)                          | 2/22 (9%)                        | NS           |
| Neutropenia (≤1 × 10 <sup>9</sup> /L)*                               | <b>5/39 (13%)</b>                  | <b>9/23 (39%)</b>                | <b>0.02</b>  |
| Severe Neutropenia (≤0.5 × 10 <sup>9</sup> /L)*                      | <b>0/39 (0%)</b>                   | <b>4/23 (17%)</b>                | <b>0.02</b>  |
| Other associated diseases                                            |                                    |                                  |              |
| Other clonal/neoplastic diseases*                                    | 9/30 (30%)                         | 3/20 (15%)                       | NS           |
| Autoimmune diseases* (including cytopenias)                          | 14/32 (44%)                        | 15/23 (65%)                      | NS (0.1)     |
| Autoimmune diseases* (other than cytopenias)                         | 4/31 (13%)                         | 7/23 (30%)                       | NS           |
| Other diseases*                                                      | 8/31 (26%)                         | 9/20 (45%)                       | NS           |
| Outcome and follow-up                                                |                                    |                                  |              |
| Need for LGLL therapy* <sup>3</sup>                                  | <b>3/38 (8%)</b>                   | <b>9/20 (45%)</b>                | <b>0.002</b> |
| Time to LGLL therapy (months) <sup>‡</sup>                           | <b>Not reached<sup>§</sup></b>     | <b>72 (1–179)</b>                | <b>0.001</b> |
| Disease Progression*                                                 | 2/32 (6%)                          | 1/19 (5%)                        | NS           |
| Deaths* (overall deaths)                                             | 6/38 (16%)                         | 2/20 (10%)                       | NS           |
| Deaths* <sup>4</sup>                                                 | 0/38 (0%)                          | 1/19 (5%)                        | NS           |

Results expressed as mean ± standard deviation (SD) (and range), \* as number of cases (percentage) or † as median (95% confidence interval). In bold: statistically significant differences ( $p$ -value ≤ 0.05). §After a median follow up of 183. <sup>1</sup>Adenopathy, splenomegaly and/or hepatomegaly. <sup>2</sup>Scleroderma. <sup>3</sup>In all cases, treatment was administered because of the presence of cytopenias and/or other associated autoimmune diseases. <sup>4</sup>All deaths were due to complications derived from the associated autoimmune disease. Abbreviations (alphabetical order): LGLL, leukemia of large granular lymphocytes; NS, no statistically significant differences ( $p$ -value > 0.05). T-LGLL, T-cell large granular lymphocytic leukemia.

**Table S7.** Clinical and biological features of TCD8<sup>+</sup>-LGLL according to their *STAT3* mutational status and the presence of bi(multi) vs. monoclonal LGL populations.

| Clinical and biological features                | Bi(multi) vs. monoclonal TCD8 <sup>+</sup> -LGLL |                     |                         |                     | p-Value               |
|-------------------------------------------------|--------------------------------------------------|---------------------|-------------------------|---------------------|-----------------------|
|                                                 | Wild-Type <i>STAT3</i>                           |                     | <i>STAT3</i> mutated    |                     |                       |
|                                                 | Bi(multi)clonal (n = 4)                          | Monoclonal (n = 12) | Bi(multi)clonal (n = 5) | Monoclonal (n = 9)  |                       |
| Sex (male/female)*                              | 3/1 (75%/25%)                                    | 7/5 (58%/42%)       | 2/3 (40%/60%)           | 5/4 (56%/44%)       | NS                    |
| Age (years)                                     | 75 ± 14 (54–85)                                  | 61 ± 21 (15–92)     | 66 ± 19 (44–90)         | 62 ± 14 (49–83)     | NS                    |
| Physical examination                            |                                                  |                     |                         |                     |                       |
| Organomegalies <sup>1</sup>                     | 0/4 (0%)                                         | 1/9 (11%)           | 2/5 (40%)               | 3/9 (33%)           | NS                    |
| Peripheral blood cell counts                    |                                                  |                     |                         |                     |                       |
| Hemoglobin (g/dL)                               | 14 ± 1.1 (14–16)                                 | 13 ± 3 (8.3–18)     | 13 ± 1 (11–14)          | 14 ± 2.3 (9.7–17)   | NS                    |
| Platelets (×10 <sup>9</sup> /L)                 | 239 ± 110 (98–363)                               | 244 ± 76 (170–383)  | 216 ± 136 (61–421)      | 185 ± 63 (121–302)  | NS                    |
| Leukocytes (×10 <sup>9</sup> /L)                | 9.3 ± 3.3 (6.1–13)                               | 8.8 ± 6.8 (3.1–28)  | 6.3 ± 3.5 (2.7–12)      | 7.2 ± 3.2 (3.1–13)  | NS                    |
| Clonal LGL cells (×10 <sup>9</sup> /L)          | 2.2 ± 2.1 (0.5–5.2)                              | 3.5 ± 4.5 (0.4–14)  | 2.2 ± 1.6 (1.2–4.5)     | 3.1 ± 2.3 (0.6–5.4) | NS                    |
| Leukocytosis (>10 × 10 <sup>9</sup> /L)*        | 2/4 (50%)                                        | 2/10 (20%)          | 1/5 (20%)               | 1/8 (13%)           | NS                    |
| Lymphocytosis (>3.5 × 10 <sup>9</sup> /L)*      | 3/4 (75%)                                        | 5/10 (50%)          | 2/5 (40%)               | 4/8 (50%)           | NS                    |
| Lymphocytosis (>5 × 10 <sup>9</sup> /L)*        | 3/4 (75%)                                        | 3/10 (30%)          | 2/5 (40%)               | 4/8 (50%)           | NS                    |
| Cytopenias                                      |                                                  |                     |                         |                     |                       |
| Anemia (≤10g/dL)*                               | 0/4 (0%)                                         | 1/10 (10%)          | 0/5 (0%)                | 0/8 (0%)            | NS                    |
| Thrombocytopenia (≤100 × 10 <sup>9</sup> /L)*   | 1/4 (25%)                                        | 0/9 (0%)            | 1/5 (20%)               | 0/8 (0%)            | NS (0.1) <sup>a</sup> |
| Neutropenia (≤1 × 10 <sup>9</sup> /L)*          | 0/4 (0%)                                         | 3/10 (9%)           | 2/5 (40%)               | 3/8 (38%)           | NS                    |
| Severe Neutropenia (≤0.5 × 10 <sup>9</sup> /L)* | 0/4 (0%)                                         | 0/10 (0%)           | 0/5 (0%)                | 1/8 (13%)           | NS                    |
| Other associated diseases                       |                                                  |                     |                         |                     |                       |
| Other clonal/neoplastic diseases*               | 0/3 (0%)                                         | 2/10 (20%)          | 1/5 (20%)               | 2/8 (25%)           | NS                    |
| Autoimmune diseases* (including cytopenias)     | 2/3 (67%)                                        | 6/11 (55%)          | 3/5 (60%)               | 5/9 (55%)           | NS                    |
| Autoimmune diseases* (other than cytopenias)    | 1/3 (33%)                                        | 1/11 (9%)           | 2/5 (40%)               | 2/9 (22%)           | NS                    |
| Other diseases*                                 | 0/3 (0%)                                         | 2/10 (20%)          | 2/5 (40%)               | 2/8 (25%)           | NS                    |
| Outcome and follow-up                           |                                                  |                     |                         |                     |                       |
| Need for LGLL therapy <sup>2</sup>              | 1/4 (25%)                                        | 1/11 (9%)           | 3/4 (75%)               | 3/9 (33%)           | NS                    |
| Time to LGLL therapy (months) <sup>#</sup>      | 55 (24–86)                                       | 65 (53–77)          | 17 (1–42)               | 70 (39–101)         | NS (0.08)             |
| Disease progression*                            | 0/4 (0%)                                         | 1/9 (11%)           | 1/4 (25%)               | 0/9 (0%)            | NS                    |
| Deaths* (overall deaths)                        | 1/4 (25%)                                        | 2/11 (20%)          | 1/4 (25%)               | 1/9 (11%)           | NS                    |
| Deaths <sup>3</sup>                             | 0/4 (0%)                                         | 0/11 (20%)          | 1/4 (25%)               | 0/8 (0%)            | NS                    |

Results expressed as mean ± standard deviation (SD) (and range), \* as number of cases (percentage) or # as mean (95% confidence interval) since median values were not reached. <sup>1</sup>Adenopathy, splenomegaly and/or hepatomegaly. <sup>2</sup>In all cases, treatment was administered because of the presence of cytopenias and/or other associated autoimmune diseases. <sup>3</sup>Death was due to complications derived from the associated autoimmune disease. <sup>a</sup>Biclonal cases vs. monoclonal cases. Abbreviations (alphabetical order): LGLL, leukemia of large granular lymphocytes; NS, no statistically significant differences (*p*-value > 0.05); T-LGLL, T-cell large granular lymphocytic leukemia.

**Table S8.** Clinical and biological features of clonal CLPD–NK cases with wild-type (WT) vs. mutated *STAT3*.

Clinical and biological features

CLPD–NK



|                                                 | Wild-Type <i>STAT3</i><br>( <i>n</i> = 10) | <i>STAT3</i> mutated<br>( <i>n</i> = 6) | <i>p</i> -Value   |
|-------------------------------------------------|--------------------------------------------|-----------------------------------------|-------------------|
| Sex (male/female)*                              | 1/9 (10%/90%)                              | 4/2 (67%/33%)                           | 0.04 <sup>1</sup> |
| Age (years)                                     | 51 ± 26 (4–83)                             | 76 ± 12 (56–89)                         | NS (0.06)         |
| Physical examination                            |                                            |                                         |                   |
| Organomegalies* <sup>2</sup>                    | 0/2 (0%)                                   | 3/6 (50%)                               | NS                |
| Skin lesions*                                   | 1/2 (50%) <sup>3</sup>                     | 0/5 (0%)                                | NS                |
| Peripheral blood cell counts                    |                                            |                                         |                   |
| Hemoglobin (g/dL)                               | <b>13 ± 1.1 (11–14)</b>                    | <b>11 ± 2.6 (6.3–13)</b>                | <b>0.04</b>       |
| Platelets (x10 <sup>9</sup> /L)                 | 230 ± 62 (150–321)                         | 185 ± 104 (61–346)                      | NS                |
| Leukocytes (x10 <sup>9</sup> /L)                | 16 ± 16 (7.3–55)                           | 12 ± 13 (2.7–36)                        | NS                |
| Clonal LGL cells (x10 <sup>9</sup> /L)          | 16 ± 23 (2.4–50)                           | 7.3 ± 13 (0.6–30)                       | NS                |
| Leukocytosis (>10x10 <sup>9</sup> /L)*          | 4/8 (50%)                                  | 3/6 (50%)                               | NS                |
| Lymphocytosis (>3.5x10 <sup>9</sup> /L)*        | <b>8/8 (100%)</b>                          | <b>3/6 (50%)</b>                        | <b>0.05</b>       |
| Lymphocytosis (>5x10 <sup>9</sup> /L)*          | 5/8 (63%)                                  | 2/6 (33%)                               | NS                |
| Cytopenias                                      |                                            |                                         |                   |
| Anemia (≤10g/dL)*                               | 0/7 (0%)                                   | 2/6 (33%)                               | NS                |
| Thrombocytopenia (≤100x10 <sup>9</sup> /L)*     | 0/7 (0%)                                   | 2/6 (33%)                               | NS                |
| Neutropenia (≤1x10 <sup>9</sup> /L)*            | 1/8 (13%)                                  | 1/6 (17%)                               | NS                |
| Other associated diseases                       |                                            |                                         |                   |
| Other clonal/neoplastic diseases*               | 1/2 (50%)                                  | 1/6 (17%)                               | NS                |
| Autoimmune diseases*<br>(including cytopenias)  | 2/3 (67%)                                  | 4/6 (67%)                               | NS                |
| Autoimmune diseases*<br>(other than cytopenias) | 1/2 (50%)                                  | 0/6 (0%)                                | NS                |
| Other diseases*                                 | 2/2 (100%)                                 | 1/4 (25%)                               | NS                |
| Outcome and follow-up                           |                                            |                                         |                   |
| Need for LGLL therapy* <sup>4</sup>             | 1/6 (17%)                                  | 4/5 (80%)                               | NS (0.08)         |
| Time to LGLL therapy (months) <sup>#</sup>      | <b>88 (56–119)</b>                         | <b>6 (1–15)</b>                         | <b>0.05</b>       |
| Disease progression*                            | <b>0/4 (0%)</b>                            | <b>3/4 (75%)</b>                        | NS (0.1)          |
| Deaths* (overall deaths)                        | 2/6 (33%)                                  | 3/5 (60%)                               | NS                |
| Deaths* <sup>5</sup>                            | 1/6 (17%)                                  | 2/5 (40%)                               | NS                |

Results expressed as mean ± standard deviation (SD) (and range), \* as number of cases (percentage) or # as mean (95% confidence interval) since median values were not reached. In bold: statistically significant differences (*p*-value ≤ 0.05). <sup>1</sup>Selection bias, due to the absence of an assay to confirm clonality in male patients but the presence of *STAT3* mutation; the only male case included in the WT group had an aberrant NK-cell phenotype (CD2-CD94<sup>+</sup>HLADR<sup>+</sup>), previously found to be systematically associated with monoclonality [14]. <sup>2</sup>Adenopathy, splenomegaly and/or hepatomegaly. <sup>3</sup>Scleroderma. <sup>4</sup>In all cases, treatment was administered because of the presence of cytopenias and/or other associated autoimmune diseases. <sup>5</sup>All deaths were due to complications derived from the

associated autoimmune disease. Abbreviations (alphabetical order): LGLL, leukemia of large granular lymphocytes; CLPD–NK, chronic lymphoproliferative disorder of NK cells; NS, no statistically significant differences ( $p$ -value > 0.05); WT, wild-type.

**Table S9.** Distribution of LGLL cases and non-LGL CLPD patients ( $n = 117$ ) included in this study and the corresponding populations of LGL identified ( $n = 165$ ) classified according to their phenotypic profile and (mono vs. oligo/poly) clonal nature.

| Distribution of Cases and Populations Included                                              |                                                                 | LGL Lymphocytosis                          |                                 |                                  | Non-LGL Cell Populations From CLPD |                                      |                                    |                                     |
|---------------------------------------------------------------------------------------------|-----------------------------------------------------------------|--------------------------------------------|---------------------------------|----------------------------------|------------------------------------|--------------------------------------|------------------------------------|-------------------------------------|
|                                                                                             |                                                                 | Clonal <sup>‡</sup><br><i>n</i> = 82 (100) | Oligoclonal<br><i>n</i> = 6 (8) | Polyclonal<br><i>n</i> = 12 (12) | TOTAL LGL<br><i>n</i> = 100 (120)  | Clonal (CLPD)*<br><i>n</i> = 17 (19) | Polyclonal**<br><i>n</i> = NA (26) | TOTAL Non-LGL<br><i>n</i> = 17 (45) |
| T-cell lineage<br><i>n</i> = 94<br>–77 LGL and 17 non-LGL–<br>( <i>n</i> = 141 populations) | TCD8 <sup>+</sup>                                               | 33 (50)<br>40% (50%)                       | 4 (5)<br>67% (63%)              | 4 (4)<br>34% (34%)               | <b>41 (59)</b><br>41% (49%)        | 2 (3)                                | (11)                               | <b>2 (14)</b>                       |
|                                                                                             | LGL TCD4 <sup>+</sup>                                           | 14 (15)<br>17% (15%)                       |                                 |                                  | <b>14 (15)</b><br>14% (12%)        |                                      |                                    |                                     |
|                                                                                             | Non-LGL<br>TCRαβ <sup>+</sup> CD4 <sup>+</sup> CD8 <sup>–</sup> |                                            |                                 |                                  |                                    | 11 (11)                              | (12)                               | <b>11 (23)</b>                      |
|                                                                                             | Tαβ <sup>+</sup> DP                                             | 1 (1)<br>1% (1%)                           |                                 |                                  | <b>1 (1)</b><br>1% (1%)            |                                      | (1)                                | <b>(1)</b>                          |
|                                                                                             | Tαβ <sup>+</sup> DN                                             | 2 (2)<br>2% (2%)                           |                                 |                                  | <b>2 (2)</b><br>2% (2%)            | 1 (1)                                | (1)                                | <b>1 (2)</b>                        |
|                                                                                             | Tγδ <sup>+</sup>                                                | 16 (16)<br>20% (16%)                       | 2 (3)<br>33% (37%)              | 1 (1)<br>8% (8%)                 | <b>19 (20)</b><br>19% (16%)        | 3 (4)                                |                                    | <b>3 (4)</b>                        |
| Subtotal                                                                                    | 66 (84)                                                         | 6 (8)                                      | 5 (5)                           | <b>77 (97)</b>                   | 17 (19)                            | 0 (25)                               | <b>17 (44)</b>                     |                                     |
| NK-cell lineage<br><i>n</i> = 23<br>( <i>n</i> = 24 populations)                            | CD56 <sup>–/+lo</sup>                                           | 7 (7)<br>9% (7%)                           |                                 | 1 (1)<br>8% (8%)                 | <b>8 (8)</b><br>8% (7%)            |                                      |                                    |                                     |
|                                                                                             | CD56 <sup>+</sup>                                               | 7 (7)<br>9% (7%)                           |                                 | 6 (6)<br>50% (50%)               | <b>13 (13)</b><br>13% (11%)        |                                      |                                    |                                     |
|                                                                                             | CD56 <sup>++</sup>                                              | 2 (2)<br>2% (2%)                           |                                 |                                  | <b>2 (2)</b><br>2% (2%)            |                                      | (1)                                | <b>(1)</b>                          |
|                                                                                             | Subtotal                                                        | 16 (16)                                    | 0 (0)                           | 7 (7)                            | <b>23 (23)</b>                     | 0 (0)                                | 0 (26)                             | <b>0 (1)</b>                        |

Results expressed as number of cases (number of cell populations) studied and their percentage (in italic) per LGL Lymphocytosis category. Empty cells mean no cases and no cell populations. In bold: total LGL and non-LGL cases and populations per category <sup>‡</sup>A more in-depth study of all LGL populations was carried out in 59/82 monoclonal cases, from which 14/59 clonal LGL cases (24%) showed ≥2 different populations of expanded/aberrant LGL cells, and they were classified within the phenotypic group corresponding to the major cell population, as follows: i) 6/14 cases were classified as TCD8<sup>+</sup> (2 cases had two different clonal populations of TCD8<sup>+</sup> cells; 2 cases had three different clonal populations of TCD8<sup>+</sup> cells; 1 case had four different clonal populations of TCD8<sup>+</sup> cells; and 1 case had one clonal population of TCD8<sup>+</sup> cells coexisting with a TCD4<sup>+</sup> population); ii) 4/14 cases classified as Tγδ<sup>+</sup> category (all showing one clonal Tγδ<sup>+</sup> cell population coexisting with another TCD8<sup>+</sup> cell population); iii) 2/14 cases were classified as TCD4<sup>+</sup> (both of them displaying an additional clonal TCD8<sup>+</sup> cell population); iv) 1/14 cases classified as Tαβ<sup>+</sup>DN (one clonal Tαβ<sup>+</sup>DN population coexisted with another TCD8<sup>+</sup> cell clonal population); and v) 1/14 cases belonged to the CD56<sup>–/+lo</sup> NK–

cell category (with an additional TCD8<sup>+</sup> cell clonal population). A total of 8 clonal LGL populations out of the 14 multiclonal cases were sorted for further analysis, while the remaining 6 T-LGL populations found to be clonal by phenotype could not be purified. \*Monoclonal non-LGL cases ( $n = 17$ ) correspond to: 7 peripheral T-cell lymphoma not otherwise specified; 3 T-cell prolymphocytic leukemia; 2 hepatosplenic T-cell lymphomas; 1 Sézary syndrome; 1 adult T-cell leukemia/lymphoma; 1 CD3-CD4<sup>+</sup> lymphoid variant of hypereosinophilic syndrome; 1 intestinal T-cell lymphoma; 1 hydroa vacciniforme-like lymphoproliferative disorder. In each case, a single clonal non-LGL population was identified and purified for further analyses, except in a patient diagnosed with Sézary syndrome and a hepatosplenic T-cell lymphoma case, in which two different clonal T-cell populations were identified and purified. \*\*Phenotypically normal residual T/NK-cell populations (polyclonal) from patients with clonal T-cell expansions (control group). In addition to normal residual T/NK-cell populations, a total of 7 myeloid cell populations (i.e., neutrophils) from patients with different clonal T-LGL disorders were also screened for the presence of *STAT3* and *STAT5B* mutations. Abbreviations (alphabetical order): CLPD, chronic lymphoproliferative disorder; LGL, large granular lymphocytes; NA, not applicable.

**Table S10.** Panels of fluorochrome-conjugated antibodies (specificities and sources) used for sequential immunophenotypic analyses of LGLL by flow cytometry.

| Suppl. Panel A. LST (EuroFlow Lymphocytosis Screening Tube) <sup>1</sup>                                                              |        |              |                          |                          |            |                 |                 |       |
|---------------------------------------------------------------------------------------------------------------------------------------|--------|--------------|--------------------------|--------------------------|------------|-----------------|-----------------|-------|
| PacB                                                                                                                                  | OC515* | FITC         | PE                       | PerCPCy5.5               | PECy7      | APC             | APCH7           |       |
| CD20                                                                                                                                  | CD45   | CD8          | CD56                     | CD5                      | CD19       | SmCD3           | CD38            |       |
| CD4                                                                                                                                   |        | Anti-Igλ     | Anti-Igκ                 |                          | Anti-TCRγδ |                 |                 |       |
| Marker                                                                                                                                |        | Fluorochrome |                          | Clone                    |            | Manufacturer    |                 |       |
| SmCD3                                                                                                                                 |        | APC          |                          | SK7                      |            | BD              |                 |       |
| CD4                                                                                                                                   |        | PacB         |                          | RPA-T4                   |            | BioLegend       |                 |       |
| CD5                                                                                                                                   |        | PerCPCy5.5   |                          | L17F12                   |            | BD              |                 |       |
| CD8                                                                                                                                   |        | FITC         |                          | UCH-T4                   |            | Cytognos        |                 |       |
| CD19                                                                                                                                  |        | PECy7        |                          | J3-119                   |            | Beckman Coulter |                 |       |
| CD20                                                                                                                                  |        | PacB         |                          | 2H7                      |            | BioLegend       |                 |       |
| CD38                                                                                                                                  |        | APCH7        |                          | HB7                      |            | BD              |                 |       |
| CD45                                                                                                                                  |        | OC515        |                          | GA90                     |            | Cytognos        |                 |       |
| CD56                                                                                                                                  |        | PE           |                          | C5.9                     |            | Cytognos        |                 |       |
| Igκ                                                                                                                                   |        | PE           |                          | Polyclonal               |            | Cytognos        |                 |       |
| Igλ                                                                                                                                   |        | FITC         |                          | Polyclonal               |            | Cytognos        |                 |       |
| TCRγδ                                                                                                                                 |        | PECy7        |                          | 11F2                     |            | BD              |                 |       |
| Suppl. Panel B. Immunophenotypic panel assessed to T-cell clonality of TCR-Vβ (Panel B.1) and both TCR-Vγ and Vδ cells (Panel B.2)    |        |              |                          |                          |            |                 |                 |       |
| Suppl. Panel B.1. TCR-Vβ clonality assessment using the <i>IOtest® Beta Mark TCR Vβ Repertoire Kit (Beckman Coulter)</i> <sup>2</sup> |        |              |                          |                          |            |                 |                 |       |
| Tube                                                                                                                                  | PacB   | OC515*       | FITC                     | PE                       | PerCPCy5.5 | PECy7           | APC             | APCH7 |
| A-H                                                                                                                                   | CD4    | -            | TCR-Vβ "a"<br>TCR-Vβ "b" | TCR-Vβ "b"<br>TCR-Vβ "c" | SmCD3      | -               | -               | CD8   |
| "Tube"                                                                                                                                |        | Marker       | Fluorochrome             |                          | Clone      |                 | Manufacturer    |       |
| A                                                                                                                                     | a      | TCR-Vβ 5.3   | PE                       |                          | 3D11       |                 | Beckman Coulter |       |

|   |   |             |           |           |                 |
|---|---|-------------|-----------|-----------|-----------------|
|   | b | TCR-Vβ 7.1  | PE + FITC | ZOE       | Beckman Coulter |
|   | c | TCR-Vβ 3    | FITC      | CH92      | Beckman Coulter |
| B | a | TCR-Vβ 9    | PE        | FIN9      | Beckman Coulter |
|   | b | TCR-Vβ 17   | PE + FITC | E17.5F3   | Beckman Coulter |
|   | c | TCR-Vβ 16   | FITC      | TAMAYA1.2 | Beckman Coulter |
| C | a | TCR-Vβ 18   | PE        | BA62.6    | Beckman Coulter |
|   | b | TCR-Vβ 5.1  | PE + FITC | IMMU157   | Beckman Coulter |
|   | c | TCR-Vβ 20   | FITC      | ELL1.4    | Beckman Coulter |
| D | a | TCR-Vβ 13.1 | PE        | IMMU222   | Beckman Coulter |
|   | b | TCR-Vβ 13.6 | PE + FITC | JU74.3    | Beckman Coulter |
|   | c | TCR-Vβ 8    | FITC      | 56C5.2    | Beckman Coulter |
| E | a | TCR-Vβ 5.2  | PE        | 36213     | Beckman Coulter |
|   | b | TCR-Vβ 2    | PE + FITC | MPB2D5    | Beckman Coulter |
|   | c | TCR-Vβ 12   | FITC      | VER2.32   | Beckman Coulter |
| F | a | TCR-Vβ 23   | PE        | AF23      | Beckman Coulter |
|   | b | TCR-Vβ 1    | PE + FITC | BL37.2    | Beckman Coulter |
|   | c | TCR-Vβ 21.3 | FITC      | IG125     | Beckman Coulter |
| G | a | TCR-Vβ 11   | PE        | C21       | Beckman Coulter |
|   | b | TCR-Vβ 22   | PE + FITC | IMMU546   | Beckman Coulter |
|   | c | TCR-Vβ 14   | FITC      | CAS1.1.3  | Beckman Coulter |
| H | a | TCR-Vβ 13.2 | PE        | H132      | Beckman Coulter |
|   | b | TCR-Vβ 4    | PE + FITC | WJF24     | Beckman Coulter |
|   | c | TCR-Vβ 7.2  | FITC      | ZIZOU4    | Beckman Coulter |

Suppl. Panel B.2. Assessment of TCR-Vγ and Vδ clonality<sup>2</sup>

| Tube    | PacB | OC515*       | FITC   | PE      | PerCPCy5.5 | PECy7           | APC | APCH7 |
|---------|------|--------------|--------|---------|------------|-----------------|-----|-------|
| 1       | CD4  | -            | TCR-γ9 | -       | SmCD3      | -               | -   | CD8   |
| 2       | CD4  | -            | TCR-δ2 | -       | SmCD3      | -               | -   | CD8   |
| Marker  |      | Fluorochrome |        | Clone   |            | Manufacturer    |     |       |
| TCR-Vγ9 |      | FITC         |        | IMMU360 |            | Beckman Coulter |     |       |
| TCR-Vδ2 |      | FITC         |        | IMMU389 |            | Beckman Coulter |     |       |

Suppl. Panel C. EuroFlow panels for characterization/classification of T-cell (Panel C.1) and NK-cell (Panel C.2) chronic lymphoproliferative disorders (CLPD)

Suppl. Panel C.1. EuroFlow T-cell CLPD panel

| Tube | PacB | OC515* | FITC  | PE    | PerCPCy5.5 | PECy7  | APC    | APCH7 |
|------|------|--------|-------|-------|------------|--------|--------|-------|
| 1    | CD4  | CD45   | CD7   | CD26  | SmCD3      | CD2    | CD28   | CD8   |
| 2    | CD4  | CD45   | CD27  | CD197 | SmCD3      | CD45RO | CD45RA | CD8   |
| 3    | CD4  | CD45   | CD5   | CD25  | SmCD3      | HLADR  | CyTCL1 | CD8   |
| 4    | CD4  | CD45   | CD57  | CD30  | SmCD3      | -      | CD11c  | CD8   |
| 5    | CD4  | CD45   | CyPER | CyGRA | SmCD3      | CD16   | CD94   | CD8   |

| 6                                             | CD4          | CD45   | -            | CD279 | SmCD3      | -     | -     | CD8          |
|-----------------------------------------------|--------------|--------|--------------|-------|------------|-------|-------|--------------|
|                                               | Marker       |        | Fluorochrome |       | Clone      |       |       | Manufacturer |
|                                               | CD2          |        | PECy7        |       | L303.1     |       |       | BD           |
|                                               | SmCD3        |        | PerCPCy5.5   |       | SK7        |       |       | BD           |
|                                               | CD4          |        | PacB         |       | RPA-T4     |       |       | BioLegend    |
|                                               | CD5          |        | FITC         |       | L17F12     |       |       | BD           |
|                                               | CD7          |        | FITC         |       | 4H9        |       |       | BD           |
|                                               | CD8          |        | APCH7        |       | SK1        |       |       | BD           |
|                                               | CD11c        |        | APC          |       | S-HCL-3    |       |       | BD           |
|                                               | CD16         |        | PECy7        |       | 3G8        |       |       | BD           |
|                                               | CD25         |        | PE           |       | 2A3        |       |       | BD           |
|                                               | CD26         |        | PE           |       | L272       |       |       | BD           |
|                                               | CD27         |        | FITC         |       | L128       |       |       | BD           |
|                                               | CD28         |        | APC          |       | CD28.2     |       |       | BD           |
|                                               | CD30         |        | PE           |       | BerH8      |       |       | BD           |
|                                               | CD45         |        | OC515        |       | GA90       |       |       | Cytognos     |
|                                               | CD45RA       |        | APC          |       | HI100      |       |       | BD           |
|                                               | CD45RO       |        | PECy7        |       | UCHL1      |       |       | BD           |
|                                               | CD57         |        | FITC         |       | HNK-1      |       |       | BD           |
|                                               | CD94         |        | APC          |       | HP-3D9     |       |       | BD           |
|                                               | CD197        |        | PE           |       | 150503     |       |       | R&D          |
|                                               | CD279        |        | PE           |       | MIH4       |       |       | BD           |
|                                               | CyGranzyme B |        | PE           |       | CLB-GB11   |       |       | Sanquin      |
|                                               | CyPerforin   |        | FITC         |       | δG9        |       |       | BD           |
|                                               | CyTCL1       |        | APC          |       | eBio1-21   |       |       | eBioscience  |
|                                               | HLADR        |        | PECy7        |       | L243       |       |       | BD           |
| Suppl. Panel C.2. EuroFlow NK-cell CLPD panel |              |        |              |       |            |       |       |              |
| Tube                                          | PacB         | OC515* | FITC         | PE    | PerCPCy5.5 | PECy7 | APC   | APCH7        |
| 1                                             | CD2          | CD45   | CD7          | CD26  | SmCD3      | CD56  | CD5   | CD19         |
| 2                                             | CD16         | CD45   | CD57         | CD25  | SmCD3      | CD56  | CD11c | CD19         |
| 3                                             | HLAD<br>R    | CD45   | CyPER        | CyGRA | SmCD3      | CD56  | CD94  | CD19         |
|                                               | Marker       |        | Fluorochrome |       | Clone      |       |       | Manufacturer |
|                                               | CD2          |        | PacB         |       | TS1/8      |       |       | Biolegend    |
|                                               | SmCD3        |        | PerCPCy5.5   |       | SK7        |       |       | BD           |
|                                               | CD5          |        | APC          |       | L17F12     |       |       | BD           |
|                                               | CD7          |        | FITC         |       | 4H9        |       |       | BD           |
|                                               | CD11c        |        | APC          |       | S-HCL-3    |       |       | BD           |
|                                               | CD16         |        | PacB         |       | 3G8        |       |       | BD           |

|              |       |          |                 |
|--------------|-------|----------|-----------------|
| CD19         | APCH7 | SJ25C1   | BD              |
| CD25         | PE    | 2A3      | BD              |
| CD26         | PE    | L272     | BD              |
| CD45         | OC515 | GA90     | Cytognos        |
| CD56         | PECy7 | N901     | Beckman Coulter |
| CD57         | FITC  | HNK-1    | BD              |
| CD94         | APC   | HP-3D9   | BD              |
| CyGranzyme B | PE    | CLB-GB11 | Sanquin         |
| CyPerforin   | FITC  | δG9      | BD              |
| HLADR        | PacB  | L243     | Biolegend       |

For all panels, “stain & lyse” EuroFlow SOPs were used [56]. Combined staining for surface antigens and intracellular molecules was performed using the Fix & Perm™ reagent kit (Thermo Fisher Scientific, Waltham, MA), according to the recommendations of the manufacturer and the EuroFlow SOPs. \*May also be Pacific Orange (PacO). <sup>1</sup> Since 2016 *OneFlow™ LST* (Becton/Dickinson Biosciences) was used for the staining of the samples. <sup>2</sup> In specific cases, additional markers were also included in the empty fluorescence channels (“–”), to better identify aberrant cells (i.e., CD5). Abbreviations (alphabetical order): APC, allophycocyanin; APCH7, allophycocyanin Hilite®7; BD, Becton/Dickinson Biosciences; Cy, cytoplasmic; FITC, fluorescein isothiocyanate; Ig, immunoglobulin; OC515, Orange Cytognos™ 515; PacB, Pacific Blue™; PE, phycoerythrin; PECy7, phycoerythrin–cyanin 7; PerCPCy5.5, peridinin–chlorophyll–cyanin 5.5; Sm, surface membrane; TCR, T–cell receptor.

**Table 11.** *STAT3* and *STAT5B* primers and temperature conditions used for PCR-based gene mutation analysis.

| Gene Location |            | Forward Primer             | Reverse Primer              | Amplicon | Annealing Temperature |
|---------------|------------|----------------------------|-----------------------------|----------|-----------------------|
| <i>STAT3</i>  | Exon 19–20 | 5′-CCAGTAGGACCTGCCTGAAG–3′ | 5′-GCAAATGTGTTTTGCGAGTC–3′  | 611 bp   | 55 °C                 |
|               | Exon 21    | 5′-TCTTTCCTTCCCATGTCCTG–3′ | 5′-CAAGGATCCCAAATTTCCTCA–3′ | 304 bp   | 50 °C                 |
| <i>STAT5B</i> | Exon 16    | 5′-TGTTGGGGTTTTAAGATTTC–3′ | 5′-CAAATCAGAATGCCAACATTG–3′ | 266 bp   | 54 °C                 |

Abbreviations (alphabetical order): bp, base pair; PCR, polymerase chain reaction.
